# Supplementary material
Source: publisher site journal article supplement (https://www.dovepress.com/article/399586)
Supplement: Supplementary file 1 [file get_supplementary_file.php]

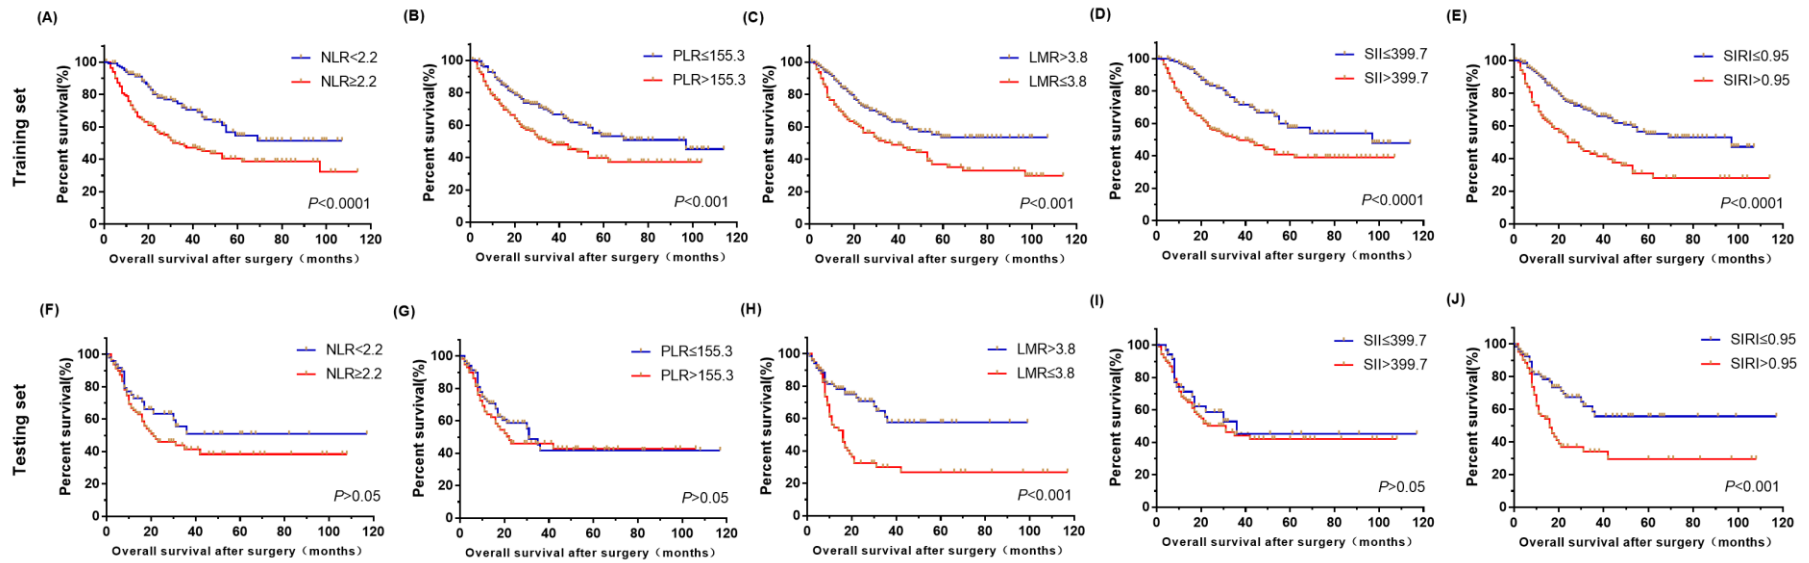

### Supplementary Figure Legend

**Figure 1.** Survival analysis curves of different inflammation-related biomarkers before surgery in patients with gallbladder carcinoma after radical resection.

(A-E). The survival analysis curves of NLR, PLR, LMR, SII, SIRI in the training set. (F-J). The survival analysis curves of NLR, PLR, LMR, SII, SIRI in the testing set.

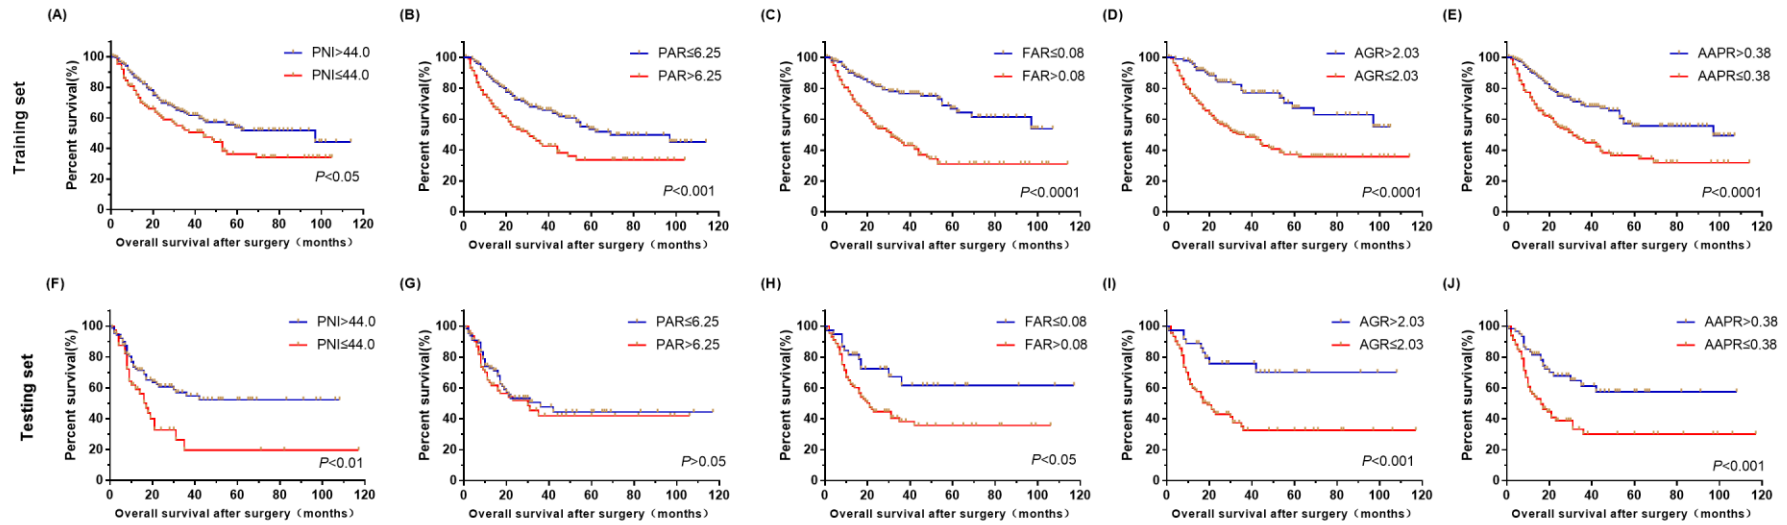

**Figure 2.** Survival analysis curves of different albumin-related biomarkers before surgery in patients with gallbladder carcinoma after radical resection.

(A-E). The survival analysis curves of PNI, PAR, FAR, AGR, AAPR in the training set. (F-J). The survival analysis curves of PNI, PAR, FAR, AGR, AAPR in the testing set.

Supplementary table 1. Comparison of the training and testing sets for GBC after radical resection

|              | Training set (%) | Testing set (%) | $\chi^2$ | <i>P</i> |
|--------------|------------------|-----------------|----------|----------|
| Sex          |                  |                 |          |          |
| Male         | 92(30.7)         | 39(30.7)        | 0.000    | 0.993    |
| Female       | 208(69.3)        | 88(69.3)        |          |          |
| Age (year)   |                  |                 |          |          |
| ≤60          | 134(44.7)        | 45(35.4)        | 3.125    | 0.077    |
| >60          | 166(55.3)        | 82(64.6)        |          |          |
| NLR          |                  |                 |          |          |
| <2.2         | 136(45.3)        | 48(37.8)        | 2.068    | 0.150    |
| ≥2.2         | 164(54.7)        | 79(62.2)        |          |          |
| PLR          |                  |                 |          |          |
| ≤155.3       | 158(52.7)        | 68(53.5)        | 0.028    | 0.868    |
| >155.3       | 142(47.3)        | 59(46.5)        |          |          |
| LMR          |                  |                 |          |          |
| >3.8         | 188(62.7)        | 70(55.1)        | 2.126    | 0.145    |
| ≤3.8         | 112(37.3)        | 57(44.9)        |          |          |
| SII          |                  |                 |          |          |
| ≤399.7       | 110(36.7)        | 35(27.6)        | 3.300    | 0.069    |
| >399.7       | 190(63.3)        | 92(72.4)        |          |          |
| SIRI         |                  |                 |          |          |
| ≤0.95        | 199(66.3)        | 76(59.8)        | 1.640    | 0.200    |
| >0.95        | 101(33.7)        | 51(40.2)        |          |          |
| PNI          |                  |                 |          |          |
| >44.0        | 190(63.3)        | 86(67.7)        | 0.750    | 0.386    |
| ≤44.0        | 110(36.7)        | 41(32.3)        |          |          |
| PAR          |                  |                 |          |          |
| ≤6.25        | 194(64.7)        | 71(55.9)        | 2.909    | 0.088    |
| >6.25        | 106(35.3)        | 56(44.1)        |          |          |
| FAR          |                  |                 |          |          |
| ≤0.08        | 134(44.7)        | 48(37.8)        | 1.723    | 0.189    |
| >0.08        | 166(55.3)        | 79(62.2)        |          |          |
| AGR          |                  |                 |          |          |
| >2.03        | 177(59.0)        | 75(59.1)        | 0.000    | 0.992    |
| ≤2.03        | 123(41.0)        | 52(40.9)        |          |          |
| AAPR         |                  |                 |          |          |
| >0.38        | 165(55.0)        | 60(47.2)        | 2.153    | 0.142    |
| ≤0.38        | 135(45.0)        | 67(52.8)        |          |          |
| CEA (ng/ml)  |                  |                 |          |          |
| ≤5.0         | 240(80.0)        | 97(76.4)        | 0.704    | 0.402    |
| >5.0         | 60(20.0)         | 30(23.6)        |          |          |
| CA19-9(U/ml) |                  |                 |          |          |
| ≤39.0        | 217(72.3)        | 87(68.5)        | 0.638    | 0.424    |
| >39.0        | 83(27.7)         | 40(31.5)        |          |          |

|                                  |           |           |       |       |
|----------------------------------|-----------|-----------|-------|-------|
| CA125(U/ml)                      |           |           |       |       |
| ≤35.0                            | 229(76.3) | 89(70.1)  | 1.836 | 0.175 |
| >35.0                            | 71(23.7)  | 38(29.9)  |       |       |
| TBIL(μmol/L)                     |           |           |       |       |
| ≤34.1                            | 273(91.0) | 114(89.8) | 0.161 | 0.689 |
| >34.1                            | 27(9.0)   | 13(10.2)  |       |       |
| Unexpected gallbladder carcinoma |           |           |       |       |
| No                               | 207(69.0) | 90(70.9)  | 0.147 | 0.702 |
| Yes                              | 93(31.0)  | 37(29.1)  |       |       |
| Gallstones                       |           |           |       |       |
| No                               | 128(42.7) | 44(34.6)  | 2.386 | 0.122 |
| Yes                              | 172(57.3) | 83(65.4)  |       |       |
| Gallbladder polyps               |           |           |       |       |
| No                               | 277(92.3) | 117(92.1) | 0.005 | 0.942 |
| Yes                              | 23(7.7)   | 10(7.9)   |       |       |
| Tumor location                   |           |           |       |       |
| Neck                             | 46(15.3)  | 21(16.5)  |       |       |
| Body and bottom                  | 184(61.3) | 80(63.0)  | 0.447 | 0.800 |
| All gallbladder                  | 70(23.3)  | 26(20.5)  |       |       |
| Morphologic grape                |           |           |       |       |
| Massive type                     | 103(34.3) | 47(37.0)  |       |       |
| Infiltrating type                | 152(50.7) | 65(51.2)  | 0.832 | 0.660 |
| Hybrid type                      | 45(15.0)  | 15(11.8)  |       |       |
| Tumor differentiation            |           |           |       |       |
| Well                             | 47(15.7)  | 21(16.5)  |       |       |
| Moderate                         | 148(49.3) | 59(46.5)  | 0.296 | 0.863 |
| Poor                             | 105(35.0) | 47(37.0)  |       |       |
| Liver involvement                |           |           |       |       |
| No                               | 223(74.3) | 86(67.7)  | 1.953 | 0.162 |
| Yes                              | 77(25.7)  | 41(32.3)  |       |       |
| Major vascular invasion          |           |           |       |       |
| No                               | 287(95.7) | 120(94.5) | 0.278 | 0.598 |
| Yes                              | 13(4.3)   | 7(5.5)    |       |       |
| Perineural invasion              |           |           |       |       |
| No                               | 274(91.3) | 111(87.4) | 1.555 | 0.212 |
| Yes                              | 26(8.7)   | 16(12.6)  |       |       |
| Microvascular invasion           |           |           |       |       |
| No                               | 285(95.0) | 127(100)  | 6.581 | 0.010 |
| Yes                              | 15(5.0)   | 0(0)      |       |       |
| AJCC 8th edition T stage         |           |           |       |       |
| T <sub>1-2</sub>                 | 61(20.3)  | 24(18.9)  |       |       |
| T <sub>3</sub>                   | 222(74.0) | 92(72.4)  | 1.342 | 0.511 |
| T <sub>4</sub>                   | 17(5.7)   | 11(8.7)   |       |       |
| AJCC 8th edition N stage         |           |           |       |       |

|                            |           |          |       |       |
|----------------------------|-----------|----------|-------|-------|
| N0                         | 225(75.0) | 89(70.1) | 1.110 | 0.292 |
| N <sub>1-2</sub>           | 75(25.0)  | 38(29.9) |       |       |
| AJCC 8th edition TNM stage |           |          |       |       |
| I-II                       | 57(19.0)  | 23(18.1) |       |       |
| III                        | 226(75.3) | 92(72.4) | 2.017 | 0.365 |
| IVA                        | 17(5.7)   | 12(9.4)  |       |       |
